# Supplementary material
Source: PubMed Central journal article supplement (PMC8195840)
Supplement: NIHMS1674696-supplement-1.pdf [file NIHMS1674696-supplement-1.pdf]

1 **Supplementary Materials**

2

| <b>Table E1. Allergen Sensitization Data</b> |                                                                          |    |                                            |
|----------------------------------------------|--------------------------------------------------------------------------|----|--------------------------------------------|
| <b>Allergen</b>                              | <b>Skin Prick Test<sup>^</sup><br/>(mm wheal, biconcave measurement)</b> |    | <b>Specific IgE<sup>§</sup><br/>(kU/L)</b> |
| <b>Controls</b>                              |                                                                          |    |                                            |
| Saline                                       | 0                                                                        | 0  | --                                         |
| Histamine                                    | 5                                                                        | 6  | --                                         |
| <b>Dust Mites</b>                            |                                                                          |    |                                            |
| Dust Mite Mix                                | 0                                                                        | 0  | --                                         |
| <i>D. pteronyssinus</i>                      | --                                                                       | -- | 0.5                                        |
| <i>D. farinae</i>                            | --                                                                       | -- | 0.67                                       |
| <b>Animals/Insects</b>                       |                                                                          |    |                                            |
| Cat                                          | 2                                                                        | 2  | 1.64                                       |
| Dog Dander<br>[HollisterStier]               | 2                                                                        | 2  | 1.14                                       |
| Cockroach Mix                                | 0                                                                        | 0  | --                                         |
| <b>Molds</b>                                 |                                                                          |    |                                            |
| <i>Aspergillus fumigatus</i>                 | 2                                                                        | 2  | 2.49                                       |
| <i>Aspergillus niger</i>                     | --                                                                       | -- | <0.35                                      |
| <i>Alternaria alternata</i>                  | 10                                                                       | 5  | --                                         |
| <i>Bipolaris sorokiniana</i>                 | 0                                                                        | 0  | --                                         |
| <i>Cladosporium</i>                          | 0                                                                        | 0  | --                                         |
| <i>Penicillium mix</i>                       | 0                                                                        | 0  | --                                         |
| <i>Candida albicans</i>                      | --                                                                       | -- | 4.49                                       |
| <b>Tree Pollens</b>                          |                                                                          |    |                                            |
| Elm Mix                                      | 0                                                                        | 0  | 18.5                                       |
| Hickory – Pecan Mix                          | 0                                                                        | 0  | 39.5                                       |
| Oak Mix / White Oak                          | 12                                                                       | 5  | 22.9                                       |
| Ash Mix                                      | 13                                                                       | 10 | 26.1                                       |

|                                           |    |    |      |
|-------------------------------------------|----|----|------|
| Birch Mix                                 | 4  | 3  | 21.1 |
| Maple Mix / Maple Leaf Sycamore           | 0  | 0  | 11.8 |
| Poplar, White / Cottonwood [White Poplar] | 0  | 0  | 12.6 |
| Sycamore, Eastern                         | 10 | 5  | --   |
| Black Walnut                              | 7  | 4  | --   |
| Black Willow                              | 5  | 5  | --   |
| Cedar, Red                                | 2  | 2  | --   |
| Beech (American)                          | -- | -- | 22.4 |
| Box Elder                                 | -- | -- | 6.89 |
| Walnut                                    | -- | -- | 21.5 |
| <b>Grass Pollens</b>                      |    |    |      |
| Grass Mix 7                               | 15 | 10 | --   |
| Meadow Fescue                             | -- | -- | 42.8 |
| Johnson Grass                             | -- | -- | 13   |
| Timothy                                   | -- | -- | 39.6 |
| Orchard                                   | -- | -- | 40.3 |
| Bermuda                                   | 20 | 7  | --   |
| Johnson                                   | 15 | 10 | 19.8 |
| Bahia                                     |    |    | 20.4 |
| <b>Weed Pollens</b>                       |    |    |      |
| Cocklebur                                 | 3  | 3  | 2.24 |
| Lamb's Quarter                            | 10 | 10 | 7.48 |
| Rough Pigweed                             | 6  | 5  | 9.09 |
| Ragweed Mix / Short ragweed               | 10 | 5  | 11.8 |
| Plantain – Sorrel Mix                     | 8  | 7  | --   |
| English Plantain                          | -- | -- | 10.6 |

|                                                                                                                                                                                                                                                                                 |    |    |       |
|---------------------------------------------------------------------------------------------------------------------------------------------------------------------------------------------------------------------------------------------------------------------------------|----|----|-------|
| Sheep Sorrel                                                                                                                                                                                                                                                                    | -- | -- | 9.31  |
| Mugwort, Common                                                                                                                                                                                                                                                                 | 15 | 13 | 7.52  |
| Baccharis                                                                                                                                                                                                                                                                       | 3  | 3  | --    |
| Goldenrod                                                                                                                                                                                                                                                                       | -- | -- | 8.35  |
| <b>Foods</b>                                                                                                                                                                                                                                                                    |    |    |       |
| Fish Mix                                                                                                                                                                                                                                                                        | 4  | 4  | --    |
| Shellfish Mix                                                                                                                                                                                                                                                                   | 5  | 4  | --    |
| Milk (Cow) IgE                                                                                                                                                                                                                                                                  | -- | -- | <0.35 |
| Cod Fish                                                                                                                                                                                                                                                                        | -- | -- | 1.09  |
| Shrimp                                                                                                                                                                                                                                                                          | -- | -- | 2.98  |
| <sup>^</sup> Performed using Stallergenes Greer allergen extracts (Lenoir, NC) with Greer pick device technique (exception is Dog dander, which used a HollisterStier extract [Spokane, WA])<br><sup>§</sup> Performed using ImmunoCAP™ (Thermo Fisher Scientific, Waltham, MA) |    |    |       |

3

4

---

**Figure E1 Legend. Selected Endoscopic Images Pre- and Post-Interventions.** At baseline, the endoscopic activity is active, with exudates, rings, edema, and furrows (Ex2, R1, E1, F1, S0). There is non-response after six-food elimination diet (SFED) and a stricture is now noted (Ex1, R2, E1, F1, S9). After OVB, there is improvement in endoscopic appearance (Ex0, R1, E0, F0, S16), but when this was stopped and during the subcutaneous immunotherapy (SCIT) build-up phase there is a flare (Ex1, R1, E1, F1, S16). Finally after 8 months of maintenance SCIT and while off topical steroids, there is complete response (Ex0, R0, E0, F0, S0).

Journal Pre-proof

| Baseline, Post-PPI<br>x 3 months                                                  | Post-SFED<br>x 6 weeks                                                            | Post-OVB<br>x 4 months                                                            | Post-OVB cessation and<br>multiallergen SCIT (build-up<br>phase) x 3 months        | Post-Multiallergen SCIT<br>(maintenance phase)<br>x 8 months                        |
|-----------------------------------------------------------------------------------|-----------------------------------------------------------------------------------|-----------------------------------------------------------------------------------|------------------------------------------------------------------------------------|-------------------------------------------------------------------------------------|
|  |  |  |  |  |
|  |  |  |  |  |

PPI, proton pump inhibitor; SFED, six-food elimination diet; OVB, oral viscous budesonide; SCIT, subcutaneous immunotherapy

Journal Pre-proof
